# Supplementary material for: Native incretins prevent the development of atherosclerotic lesions in apolipoprotein E knockout mice
Source: PubMed Central journal article supplement — Diabetologia. 2011 Jul 24;54(10):2649–59. doi: 10.1007/s00125-011-2241-2 (PMC3168747; doi:10.1007/s00125-011-2241-2), 2011-07-24
Supplement: 125_2011_2241_MOESM1_ESM.pdf [file 125_2011_2241_MOESM1_ESM.pdf]

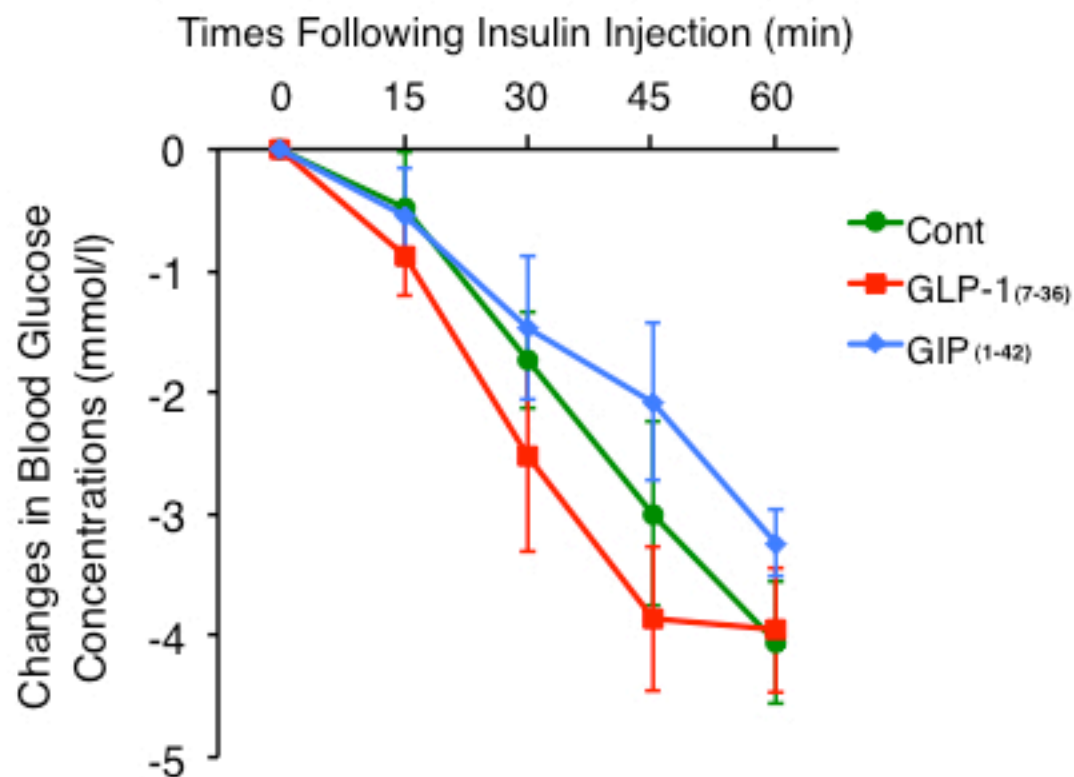

### Suppl Fig. 1. Insulin Sensitivity Test

Insulin sensitivity test was performed with an intraperitoneal injection of 0.75 units/kg insulin into *ApoE*<sup>-/-</sup> mice administered vehicle, GLP-1(7-36)amide, or GIP(1-42) (6 mice per group). Blood glucose concentrations were measured using a glucometer (Glutest NEO, Sanwa Kagaku, Nagoya, Japan).
