# Supplementary material for: Native incretins prevent the development of atherosclerotic lesions in apolipoprotein E knockout mice
Source: PubMed Central journal article supplement — Diabetologia. 2011 Jul 24;54(10):2649–59. doi: 10.1007/s00125-011-2241-2 (PMC3168747; doi:10.1007/s00125-011-2241-2), 2011-07-24
Supplement: 125_2011_2241_MOESM2_ESM.pdf [file 125_2011_2241_MOESM2_ESM.pdf]

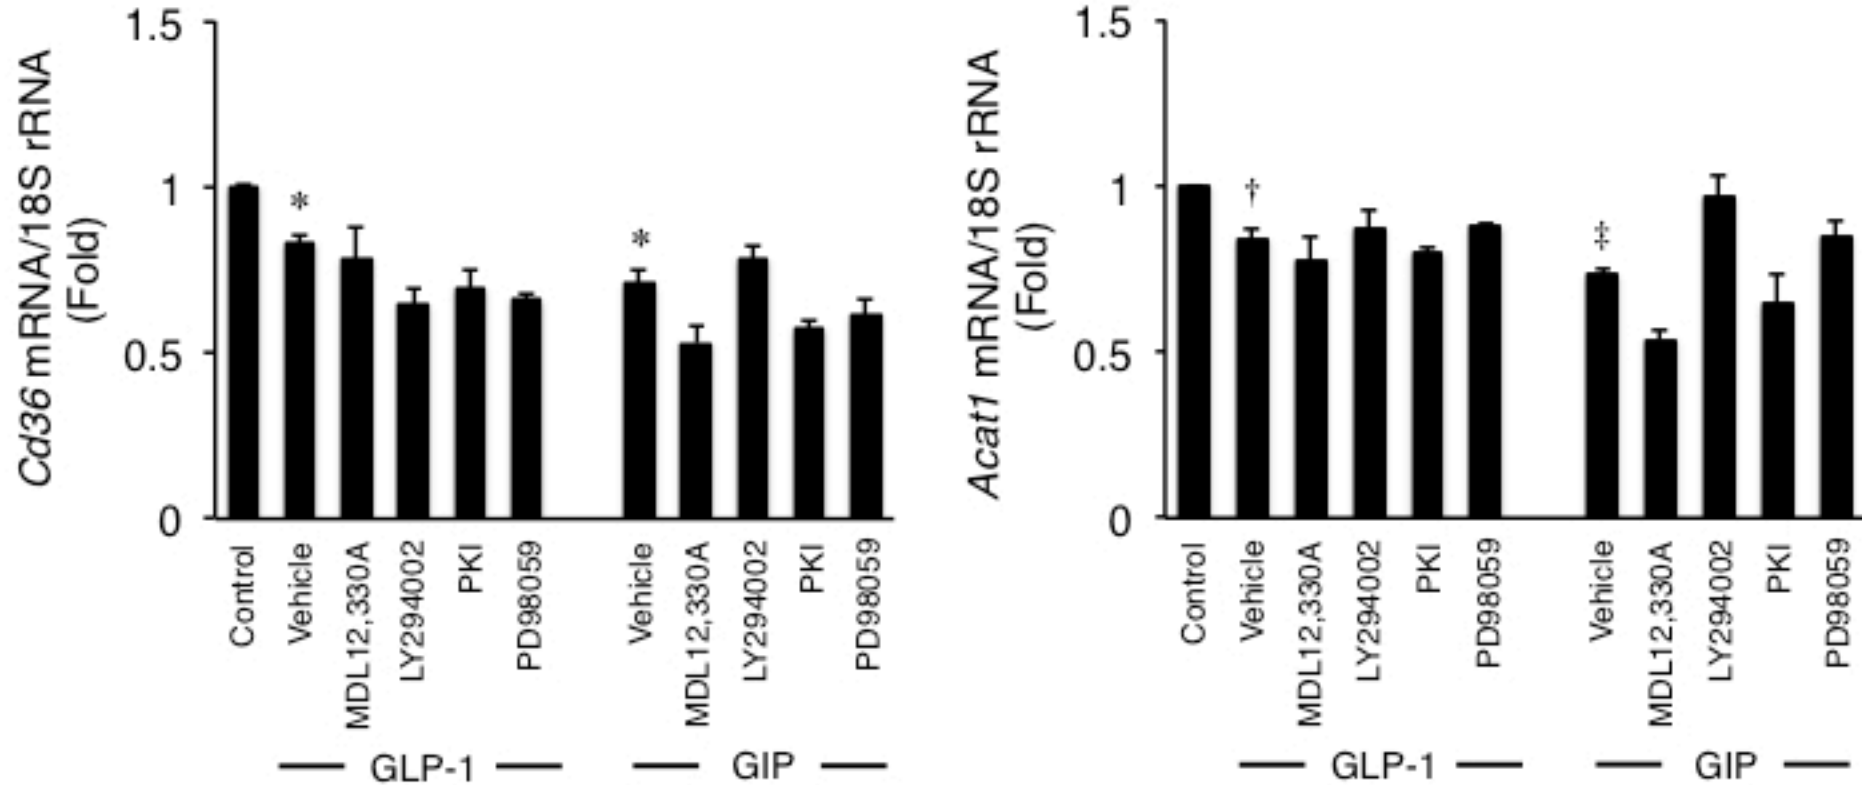

**Suppl. Fig. 2. Effects of Specific Inhibitors of Adenylate Cyclase, Phosphatidylinositol-3-Kinase (PI3K), Protein Kinase A (PKA), and Extracellular Signal-Regulated Kinase (ERK)1/2 on *Cd36* and *Acat1* mRNA Levels Induced by GLP-1 or GIP in Mouse Macrophages**

Exudate peritoneal macrophages were obtained from non-treated *Apoe*<sup>-/-</sup> mice at 9 weeks of age. Adherent macrophages were incubated for 24 h in the absence or presence of GLP-1(7-36)amide (5 nmol/l, AnaSpec, San Jose, CA, USA) or GIP(1-42) (1 nmol/l, AnaSpec). An adenylate cyclase inhibitor MDL12,330A (5  $\mu$ mol/l, Sigma, St Louis, MO, USA), a PKA inhibitor (PKAI)14-22amide (10  $\mu$ mol/l, Calbiochem, Darmstadt, Germany), a PI3K inhibitor LY294002 (1  $\mu$ mol/l, Sigma), or an ERK inhibitor PD98059 (1  $\mu$ mol/l, Sigma) was added 1 h before the addition of GLP-1(7-36)amide or GIP(1-42), respectively. *Cd36* and *Acat1* mRNA levels in macrophages were measured by real-time RT-PCR.

Each n=3 per group. \* $p$ <0.005, † $p$ <0.01, ‡ $p$ <0.0001 vs control.
